# Supplementary material for: Hypothalamic Expression of Neuropeptide Y (NPY) and Pro-OpioMelanoCortin (POMC) in Adult Male Mice Is Affected by Chronic Exposure to Endocrine Disruptors
Source: MDPI journal article supplement (doi:10.3390/metabo11060368), 2021-06-09
Supplement: s1 [file s1]

| nucleus     | TREATMENT    |                       |                        |                        |                        |                        |                        |                        |                        |
|-------------|--------------|-----------------------|------------------------|------------------------|------------------------|------------------------|------------------------|------------------------|------------------------|
|             | CRL          | TBT 0.5               | TBT 500                | DES 0.05               | DES 50                 | BPA 5                  | BPA 500                | E2 5                   | E2 50                  |
| <b>NPY</b>  |              |                       |                        |                        |                        |                        |                        |                        |                        |
| <b>DMH</b>  | 23.95 ± 1.33 | <b>19.80 ± 2.03*</b>  | <b>18.30 ± 1.54**</b>  | 22.16 ± 1.10           | <b>18.26 ± 1.55**</b>  | <b>17.04 ± 0.73***</b> | <b>16.53 ± 1.21***</b> | <b>17.44 ± 0.09***</b> | <b>17.87 ± 0.98**</b>  |
| <b>VMH</b>  | 15.85 ± 0.32 | <b>9.55 ± 1.03**</b>  | 14.12 ± 1.19           | <b>10.37 ± 0.73**</b>  | <b>9.58 ± 1.43**</b>   | <b>9.24 ± 1.06**</b>   | <b>11.16 ± 1.33*</b>   | <b>9.93 ± 0.59**</b>   | <b>10.27 ± 0.98**</b>  |
| <b>ARC</b>  | 34.74 ± 2.28 | 29.61 ± 3.50          | <b>28.50 ± 0.96*</b>   | <b>27.03 ± 1.23*</b>   | <b>21.07 ± 2.43***</b> | <b>23.99 ± 1.84**</b>  | 30.58 ± 2.10           | <b>27.16 ± 2.72*</b>   | <b>23.36 ± 1.62***</b> |
| <b>PVN</b>  | 37.46 ± 1.36 | <b>32.05 ± 1.13**</b> | <b>28.56 ± 0.79***</b> | <b>27.73 ± 1.30***</b> | <b>27.29 ± 1.48***</b> | <b>25.93 ± 1.12***</b> | <b>26.42 ± 0.54***</b> | <b>26.75 ± 0.86***</b> | <b>30.27 ± 1.22***</b> |
| <b>POMC</b> |              |                       |                        |                        |                        |                        |                        |                        |                        |
| <b>DMH</b>  | 5.63 ± 0.12  | 4.99 ± 0.17           | <b>4.57 ± 0.19**</b>   | <b>4.45 ± 0.26***</b>  | <b>4.29 ± 0.09***</b>  | <b>3.54 ± 0.10***</b>  | <b>3.24 ± 0.07</b>     | <b>3.61 ± 0.20***</b>  | <b>4.09 ± 0.25***</b>  |
| <b>ARC</b>  | 4.55 ± 0.26  | 3.92 ± 0.28           | 3.65 ± 0.26            | 3.89 ± 0.34            | <b>3.00 ± 0.31***</b>  | <b>3.23 ± 0.41**</b>   | <b>2.94 ± 0.24***</b>  | <b>3.01 ± 0.27***</b>  | 4.08 ± 0.28***         |
| <b>PVN</b>  | 16.16 ± 1.71 | 17.07 ± 0.87          | 16.68 ± 1.18           | 15.40 ± 1.08           | 16.95 ± 0.69           | 14.41 ± 1.15           | 14.95 ± 0.80           | 13.52 ± 0.43           | 15.92 ± 1.55           |
