# Supplementary material for: Hypothalamic Expression of Neuropeptide Y (NPY) and Pro-OpioMelanoCortin (POMC) in Adult Male Mice Is Affected by Chronic Exposure to Endocrine Disruptors
Source: MDPI journal article supplement (doi:10.3390/metabo11060368), 2021-06-09
Supplement: s1 [file s1]

**Table 1S** Composition of the soy-free diet (SFSD). The diet was purchased from *Laboratorio Dottori Piccioni* (Gessate, Italy).

|                                    | Soy-free standard<br>certified diet (SFSD)<br>n. 48<br>Composition % |
|------------------------------------|----------------------------------------------------------------------|
| Moisture                           | 12                                                                   |
| Crude protein                      | 22                                                                   |
| Fat                                | 5.4                                                                  |
| Fiber                              | 3.6                                                                  |
| Ash                                | 7.2                                                                  |
| Cellulose                          | -                                                                    |
|                                    | Ingredients                                                          |
| Ground grains                      | +                                                                    |
| Soybeans                           | -                                                                    |
| Meat meal                          | +                                                                    |
| Fish meal                          | +                                                                    |
| Whey                               | +                                                                    |
| Milk serum powder                  | +                                                                    |
| Brewer's yeast                     | +                                                                    |
| Alfa Alfa                          | -                                                                    |
| Maize starch                       | +                                                                    |
| Corn oil                           | +                                                                    |
| Sucrose                            | +                                                                    |
| Calcium carbonate                  | +                                                                    |
| Chrome potassium sulphate          | +                                                                    |
| Dicalcium phosphate                | +                                                                    |
| Potassium iodate                   | -                                                                    |
| Potassium sulphate                 | -                                                                    |
| Sodium chloride                    | +                                                                    |
| D,L-methionine                     | -                                                                    |
| Casein                             | -                                                                    |
|                                    | Supplements/Kg                                                       |
| VITAMIN A (UI)                     | 12000                                                                |
| VITAMINA D3 (UI)                   | 1000                                                                 |
| VITAMIN K (mg)                     | 1                                                                    |
| VITAMIN E (mg)                     | 40                                                                   |
| VITAMIN B1 (mg)                    | 8                                                                    |
| VITAMIN B2 (mg)                    | 10                                                                   |
| VITAMIN B6 (mg)                    | 10                                                                   |
| VITAMIN PP (mg)                    | 40                                                                   |
| VITAMIN B12 (mg)                   | 0.02                                                                 |
| Pantothenic acid (mg)              | 15                                                                   |
| Folic acid (mg)                    | 2                                                                    |
| Choline (mg)                       | 1000                                                                 |
| Biotin (mg)                        | 0.1                                                                  |
| Cobalt (mg)                        | 0.25                                                                 |
| Iodine (mg)                        | 0.8                                                                  |
| Manganese carbonate (mg)           | 55                                                                   |
| Iron citrate (mg)                  | 100                                                                  |
| Copper carbonate (mg)              | 8                                                                    |
| Potassium citrate monohydrate (mg) | -                                                                    |
| Sodium selenite (mg)               | -                                                                    |
| Zinc carbonate (mg)                | 50                                                                   |
